1 **Genomes of *Leishmania* parasites directly sequenced from patients with visceral leishmaniasis in**  
2 **the Indian subcontinent**

3

4 **Short title:** Genomes of *Leishmania* sequenced in clinical samples

5

6 Malgorzata A. Domagalska<sup>1#</sup>, Hideo Imamura<sup>1</sup>, Mandy Sanders<sup>2</sup>, Frederik Van den Broeck<sup>1</sup>, Narayan  
7 Raj Bhattarai<sup>3</sup>, Manu Vanaerschot<sup>1\*</sup>, Ilse Maes<sup>1</sup>, Erika D'Haenens<sup>1\*\*</sup>, Keshav Rai<sup>3</sup>, Suman Rijal<sup>3</sup>,  
8 Matthew Berriman<sup>2</sup>, James A. Cotton<sup>2#</sup>, Jean-Claude Dujardin<sup>1,4#</sup>.

9

10

11 Author Affiliations:

12 <sup>1</sup> Institute of Tropical Medicine Antwerp, Molecular Parasitology Unit, Antwerp, Belgium

13 <sup>2</sup> Wellcome Sanger Institute, Hinxton, United Kingdom

14 <sup>3</sup> BP Koirala Institute of Health Sciences, Dharan, Nepal

15 <sup>4</sup> University of Antwerp, Department of Biomedical Sciences, Antwerp, Belgium.

16

17 # Corresponding authors: email address: Malgorzata A. Domagalska ([mdomagalska@itg.be](mailto:mdomagalska@itg.be)), Jean-

18 Claude Dujardin ([jcdujardin@itg.be](mailto:jcdujardin@itg.be)), James A. Cotton ([jc17@sanger.ac.uk](mailto:jc17@sanger.ac.uk))

19 \* current address: Columbia University, Department of Microbiology and Immunology, New York,

20 USA

21 \*\* current address: University Hospital of Ghent, Center for Medical Genetics, Ghent, Belgium

22

23 **Keywords:** *Leishmania*, whole genome sequencing, genome capture, aneuploidy

24 **Abstract**

25

26 Whole genome sequencing (WGS) is increasingly used for molecular diagnosis and  
27 epidemiology of infectious diseases. Current *Leishmania* genomic studies rely on DNA  
28 extracted from cultured parasites, which might introduce sampling and biological biases into  
29 the subsequent analyses. Up to now, direct analysis of *Leishmania* genome in clinical samples  
30 is hampered by high levels of human DNA and large variation in parasite load in patient  
31 samples. Here, we present a method, based on target enrichment of *Leishmania donovani*  
32 DNA with Agilent SureSelect technology, that allows the analysis of *Leishmania* genomes  
33 directly in clinical samples. We validated our protocol with a set of artificially mixed samples,  
34 followed by the analysis of 63 clinical samples (bone marrow or spleen aspirates) from visceral  
35 leishmaniasis patients in Nepal. We were able to identify genotypes using a set of diagnostic  
36 SNPs in almost all of these samples (97%) and access comprehensive genome-wide  
37 information in most (83%). This allowed us to perform phylogenomic analysis, assess  
38 chromosome copy number and identify large copy number variants (CNVs). Pairwise  
39 comparisons between the parasite genomes in clinical samples and derived *in vitro* cultured  
40 promastigotes showed a lower aneuploidy in amastigotes as well as genomic differences,  
41 suggesting polyclonal infections in patients. Altogether our results underline the need for  
42 sequencing parasite genomes directly in the host samples.

43

44

45

46

47

48 **Author summary**

49 Visceral leishmaniasis (VL) is caused by parasitic protozoa of the *Leishmania donovani*  
50 complex and is lethal in the absence of treatment. Whole Genome Sequencing (WGS) of *L.*  
51 *donovani* clinical isolates revealed hitherto cryptic population structure in the Indian Sub-  
52 Continent and provided insights into the epidemiology and potential mechanisms of drug  
53 resistance. However, several biases are likely introduced during the culture step. We report  
54 here the development of a method that allows determination of parasite genomes directly in  
55 clinical samples, and validate it on bone marrow and splenic aspirates of VL patients in Nepal.  
56 Our study sheds a new light on the biology of *Leishmania* in the human host: we found that  
57 intracellular parasites of the patients had very low levels of aneuploidy, in sharp contrast to  
58 the situation in cultivated isolates. Moreover, the observed differences in genomes between  
59 intracellular amastigotes of the patient and the derived cultured parasites suggests  
60 polyclonality of infections, with different clones dominating in clinical samples and in culture,  
61 likely due to fitness differences. We believe this method is most suitable for clinical studies  
62 and for molecular tracking in the context of elimination programs.

63

64

65

66

67

68

## 69 Introduction

70 *Leishmania* (Kinetoplastida, Trypanosomatidae) is a genus of parasitic protozoa  
71 transmitted by sand flies to a variety of mammal hosts including humans. Within mammals,  
72 the amastigote-stage parasites are strictly intracellular and infect a range of professional  
73 phagocytes. *Leishmania* cause a broad spectrum of clinical presentations, the most severe  
74 being visceral leishmaniasis (VL) which annually affects up to 90,000 new individuals [1] and  
75 has a 10% mortality rate [2]. Ongoing control programs, like the one running in the Indian  
76 subcontinent (ISC) [3] could be challenged by several factors, including drug resistance [4,5]  
77 and emergence of new parasite variants [6,7]. More than ever, close surveillance is required  
78 to avoid new epidemics, including molecular tracking of the etiological agent.

79 Whole genome sequencing (WGS) is increasingly used for highly discriminatory  
80 parasite molecular tracking. Using that method, we previously resolved the hitherto cryptic  
81 population structure of *Leishmania donovani*, the etiological agent of visceral leishmaniasis  
82 (VL), in the Indian subcontinent ISC [8]. We identified a core group (CG) – associated with the  
83 successive VL epidemics in the lowlands – itself structured into (i) six congruent monophyletic  
84 groups (ISC2-7) together with (ii) three other groups (ISC8-10) and several ungrouped isolates,  
85 with a less certain evolutionary history. We found in the Nepalese highlands an emerging  
86 population (ISC1), quite different from the CG [6,9]. We described an unprecedented level of  
87 aneuploidy and found genetic variants likely to underpin reduced efficacy of antimonial drugs  
88 in that region.

89 However, such studies suffer a major limitation: they currently rely on sequencing  
90 parasites isolated from patients and grown axenically *in vitro*, with two possible biases. First,  
91 there could be a major representation bias, because of the variable isolation success and the  
92 high frequency (up to 90%) of asymptomatic cases [10], currently unsampled. Second, we

93 have shown experimentally major differences in the genome of *L. donovani* during the life  
94 cycle: in particular, aneuploidy was much lower and affected other chromosomes in the intra-  
95 cellular life stages (amastigotes) of infected hamsters, in comparison to cultivated  
96 promastigotes [11]. This genome plasticity may affect gene dosage and therefore have a  
97 biological impact via transcriptome and proteome changes [12]. If the phenomenon also  
98 occurs between amastigotes from human subjects and *in vitro* cultivated promastigotes, it  
99 could have a major impact on the search for molecular bio-markers for clinically important  
100 traits such as drug resistance or virulence, as relevant variants present in the host could be  
101 diluted or disappear in culture.

102         Applying parasite WGS directly in host samples thus appears critical for next  
103 generation genetic analyses of natural populations of *Leishmania*. Such applications are  
104 challenged by the low amounts of *Leishmania* DNA in biological samples and the high  
105 abundance of DNA in the nucleated host cells. Accordingly, methods for enrichment of  
106 parasite DNA are required before undertaking WGS. A series of approaches have been used  
107 for other pathogens, including (i) removal of methylated host DNA [13], (ii) selective whole  
108 genome amplification [14] or (iii) targeted genome enrichment [15]. Here, we explored the  
109 last solution. Using Agilent SureSelect technology, we designed an array for application in the  
110 *L. donovani* species complex. In this method an Illumina-based NGS sequencing library is  
111 prepared from the mixed genomic DNA sample, which is later hybridized with biotinylated  
112 RNA baits complementary to the *Leishmania* genome and the fraction of the input DNA that  
113 anneals to the baits is then sequenced (further called SuSL-seq). We validated and optimized  
114 this genome capture procedure with artificial mixtures of *Leishmania* and host DNA to  
115 simulate the proportions expected in clinical samples. Finally, we applied the method on a set  
116 of 63 bone marrow and splenic aspirates from Nepalese VL patients. In 12 of them, we

117 compared the karyotype and genome sequence with that of isolates derived from the same  
118 tissue samples. We find genomic differences between the parasites analyzed directly in  
119 clinical samples and the derived isolates, further supporting the need for direct analyses in  
120 host samples.

121

## 122 **Methods**

123

124 **Ethics statement.** The ethics committee of the Nepal Health Research Council,  
125 Kathmandu (IRC/637/014) and the corresponding bodies at the Institute of Tropical Medicine  
126 of Antwerp and the Antwerp University, Belgium (B300201627694), reviewed and approved  
127 the study protocol and the use of already-existing samples. Informed written consent was  
128 obtained from each patient or his/her guardian for those <18 years of age. All the patients  
129 and caretakers/parents had the study purpose explained to them in local language. A total of  
130 63 anonymized samples (59 bone marrows, 4 spleen aspirates from clinically confirmed VL  
131 patients in Terai, Nepal) were collected at the B.P. Koirala Institute of Health Sciences  
132 (BPKIHS) in Dharan, Nepal in the frame of four previous projects: (i) VL-project, sampling  
133 between 2000 and 2001, (ii) Leishnatdrug-R, sampling between 2002 and 2003, (iii) Kaladrug-  
134 R, sampling between 2009 and 2010 and (iv) SINGLE, sampling between 2014 and 2015. These  
135 samples are part of the same clinical studies that generated parasite isolates analyzed in [8].

136

137 **DNA extraction and next generation sequencing.** DNA from parasite cultures and  
138 clinical samples (bone marrow and spleen aspirates) was extracted using QiaAmp DNA blood  
139 mini kit (Qiagen, Venlo, the Netherlands) following the manufacturer's instructions, and DNA  
140 concentrations were verified using the Qubit broad-range DNA quantification kit (Thermo

141 Fisher Scientific, Waltham, USA). Sequencing was done following the manufacturer's standard  
142 cluster generation and sequencing protocols

143 Standard Whole Genome Sequencing was applied to isolates. Genomic DNA was  
144 sheared into 400bp fragments by focused ultrasonication (Covaris Inc., Woburn, USA).  
145 Amplification-free Illumina libraries were prepared [16] and 125bp PE reads were generated  
146 on the Illumina HiSeq v4.

147 Deep sequencing was applied to quantify parasite load in batch 1 of Bone Marrow  
148 (BM) samples. Genomic DNA was sheared into 150bp fragments by focused ultrasonication  
149 (Covaris Inc., Woburn, USA) and libraries were prepared using the SureSelect Automated  
150 Library Prep Kit (Agilent, Santa Clara, USA). Index tagged samples were amplified using KAPA  
151 HiFi DNA polymerase, (KAPA Biosystems, Wilmington, USA) and quantified using an Accuclear  
152 DNA Kit (Biotium, Fremont, USA), 75bp PE reads were generated on the Illumina HiSeq 2500.

153 SureSelect was used for *Leishmania* genome capture. Genomic DNA was sheared into  
154 150bp fragments by focused ultrasonication (Covaris Inc., Woburn, USA) and libraries were  
155 prepared, either as described above, or using the NEBNext Ultra II DNA Library prep Kit (New  
156 England Biolabs, Ipswich, USA). Samples were tagged with a unique index, amplified and  
157 quantified by qPCR (S1 Text). Samples were then pooled into batches for SureSelect  
158 enrichment, based on qPCR estimates of parasite load, so that each batch had as little  
159 variation in parasite load as possible: we aimed for only a 2-fold variation within a batch, while  
160 optimising the use of the sequencing data. Based on our experience of enrichment levels  
161 obtained in the experimental samples, batch sizes varied from 6 or 7 samples per batch where  
162 they had less than 0.05% *Leishmania* gDNA content up to 8 samples for higher parasite load.  
163 Samples were pooled within batches in an equimolar fashion. Pooled material was taken  
164 forward for hybridization, capture and enrichment using the standard SureSelect Target

165 Enrichment System XT2 protocol recommended by the manufacturer (Agilent Technologies  
166 <https://www.agilent.com/cs/library/usermanuals/Public/G9630-90000.pdf>). Custom  
167 designed oligonucleotide baits were used at a 1:10 stock dilution. 75bp paired-end reads were  
168 generated on the Illumina HiSeq 2500.

169 Amplicon sequencing was used to explore the presence of minor genetic variants in  
170 clinical samples. In the first step we used the primers listed in Text S1 to amplify fragments  
171 that contained diagnostic SNPs/insertion for ISC3, ISC4, ISC5 and ISC5 groups using  
172 Advantage 2 Polymerase Mix (TAKARA, Kusatsu, Japan). 2µl of template with varying DNA  
173 concentration were used in a total of 50µl PCR reaction (S1 Dataset A). Touch down PCR  
174 with the following conditions was used: 95°C for 5 mins followed by 16 cycles of 95°C for  
175 30s, 68°C to 60°C (decrease of 0.5°C with each cycle) for 30s, 68°C for 30sec, followed by 19  
176 cycles of 95°C for 30s, 60°C for 30s, 68°C for 30s and a final step at 68°C for 10min. Then, a  
177 second round amplification was performed, using 5µl of template, to add indexed Illumina  
178 adapters [17]. PCR conditions of the second round were 95°C for 3 mins followed by 10  
179 rounds of 98°C for 20s, 65°C for 30s, 72°C for 30s finishing with 5 mins at 72°C. The final  
180 products were purified using AMPure XP SPRI beads and quantified on a plate reader using  
181 an AccuClear DNA quantification kit (Biotium, Fremont, USA) followed by equimolar pooling.  
182 Due to low base diversity of the amplicons, 20% PhiX was spiked into the resulting pool and  
183 300bp PE reads were generated on the Illumina MiSeq.

184

185 **DNA read mapping, SNP and indel calling.** SuSL-seq reads from clinical samples and  
186 data from 204 (54 strains, 150 isolates) previously sequenced *L. donovani* genomes [8] were  
187 mapped to the improved reference *L. donovani* genome LdBPKv2 [11], using Smalt v7.4  
188 (<http://www.sanger.ac.uk/science/tools/smalt-0>). The methods were reported elsewhere



189 [11]. Briefly, Smalt options for exhaustive searching for optimal alignments (-x) and random  
190 mapping of multiple hit reads were used. Reads were mapped when mapping base identity  
191 was greater than or equal to 80% to the reference genome (-y 0.8), to eliminate spuriously  
192 mapped reads mainly from human DNA. For the sequence analyses, all reads mapped to the  
193 reference, not limited to bait locations, were analyzed. For phylogenetic analyses and for  
194 evaluating the accuracy of SuSL-seq data, we used the population SNP and indel calling mode  
195 of UnifiedGenotyper in Genome Analysis Toolkit v3.4 with the SNP cut off 4000 used  
196 (GATK: <https://software.broadinstitute.org/gatk/>). No lower or higher depth cut off was used  
197 in the population SNP calling since the depth of some SuSL-seq samples was quite low.

198

199 **Reference genome masking and SNP screening.** To mask repetitive regions and  
200 regions prone to generate false positive SNPs due to the presence of non-*Leishmania* DNA in  
201 clinical samples, we masked 7,453 regions that spanned a total of 43,200 bases. These  
202 regions were identified by blast similarity hits [8] and by using SNPs that were generated by  
203 pure human DNA SureSelect analysis and samples with lower amount of *Leishmania* DNA.  
204 The masked positions were provided in MaskSuSL4.bed file. We also excluded a SNP cluster  
205 containing more than 7 SNPs within 60 neighboring bases to exclude false SNPs from  
206 simulated *Leishmania* DNA samples mixed with mouse DNA Mpd1 and Mpd2. This was  
207 effective to eliminate non-*Leishmania* reads with a dozen of SNPs but with highest mapping  
208 score 60.

209

210 **Somy estimation.** For somy estimation, 2 different methods were used. For samples  
211 with consistently high-quality mapping against *Leishmania*, such as genomic libraries from  
212 cultured promastigotes we used the median depth across each chromosome [11,18]. For

213 samples whose read coverage depth was more variable, such as amplified and unamplified  
214 clinical samples, depth was calculated in 1000bp windows to allow a more uniform analysis  
215 of coverage variation [11]. Previous studies have shown some correlation between read  
216 coverage depth and chromosome length for some sequencing runs [11]. To correct this bias,  
217 we applied local median correction [11]. This method calculates some based on the median  
218 coverage values of chromosomes with similar lengths. In the calculation of some, the first  
219 7,000 bases and last 2,000 bases of each chromosome were excluded because these regions  
220 tend to be repetitive telomeric regions and their depth was not reliable. Similarly, certain  
221 over-amplified chromosome regions were excluded from depth calculation for SuSL-seq  
222 samples: these regions were listed in S1 Dataset B. The range of monosomy, disomy,  
223 trisomy, tetrasomy, and pentasomy was defined to be the full cell-normalized chromosome  
224 depth or S-value:  $S < 1.5$ ,  $1.5 \leq S < 2.5$ ,  $2.5 \leq S < 3.5$ ,  $3.5 \leq S < 4.5$ , and  $4.5 \leq S < 5.5$ ,  
225 respectively [11].

226

227 **Gene copy number variation.** Local copy number variants were detected as  
228 described elsewhere [8]. In brief, we calculated an average normalised haploid depth of H-  
229 locus (Ld23: 90426 - 104470) and M-locus (Ld36: 2558460 - 2576450) for each strain and  
230 then obtained an average normalised haploid depth and standard deviation for each group.  
231 For ISC1-specific CNVs, we calculated an average normalised haploid depth for each gene  
232 for each ISC1 strain and then obtained an average normalised haploid depth and standard  
233 deviation for each CG group, using the depth of 191 sequenced strains (promastigotes). ISC1  
234 specific gene CNVs were then defined to be genes whose normalized haploid depth differed  
235 more than  $\pm 0.3$  from the baseline average depth of other ISC groups. The value 0.3 was

236 chosen here because we have observed many long CNVs in trisomic chromosomes, which  
237 were amplified or deleted in 1 of the 3 homologous chromosomes.

238

239 **Phylogenetic analysis.** For phylogenetic analysis, 197 variable sites represented by  
240 394 bases were used to perform neighbor-joining analysis using the p-distance model with  
241 1000 bootstrap replicates as performed in MEGA 7.0.21 [19] and Splitstree v4 [20]. These  
242 analyses used 191 promastigote strains plus 51 clinical samples (one clinical sample from ISC1  
243 was excluded because phylogenetically too divergent). Artificial mixtures of *Leishmania* and  
244 human DNA (*Leishmania* DNA percentage of 0.06%) were used to measure the accuracy to  
245 multiple infections of the phylogenetic analyses.

246

247 **Identifying minor ISC genotypes and polyclonal infections with SuSL-seq reads.** Two  
248 methods were used to identify minor ISC genotypes, respectively based on (i) SNP motifs  
249 specific of ISC groups and (ii) alternative allele frequency from sequenced reads.

250 We first extracted genotype specific 23-mer motifs that contained a SNP or reference  
251 base at the center. For ISC3, ISC4, ISC5, ISC6 and ISC7 groups, we created 26, 53, 38, 26 and  
252 14 motifs that matched SNPs common to these groups, respectively. These group specific  
253 SNPs were identified using 191 samples analyzed in the previous study [8] and mapped to the  
254 PacBio reference [11]. To identify minor genotype reads which may have been missed by the  
255 standard SNP calling, we counted the reads in the alignment files that contained genotype  
256 specific motifs. These motifs were listed in S1 Dataset A and used to estimate the proportion  
257 of ISC3, ISC4, ISC5, ISC6 and ISC7 in each sample.

258 In the second approach, a GATK population VCF file for bone marrow and  
259 promastigotes were converted to a table that contained alternative allele frequency. In  
260 addition, total read depth, reference read depth, alternative allele read depth and genotype  
261 information created for VCF file were kept along alternative allele frequency. We checked  
262 alternative allele frequencies at group specific SNP sites to identify polyclonal samples. A  
263 mean of alternative allele frequency was calculated by averaging alternative allele  
264 frequencies at all ISC specific SNP sites per sampling, excluding missing depth sites.

265

266 **Identifying minor ISC groups using Amplicon sequencing.** We applied a read count  
267 method and an exact motif matching method to identify minor ISC groups using amplicon  
268 sequencing. The read count method was based on samtools pileup and included reads  
269 marked as PCR duplicates, counting all four bases to access back ground base error rates. The  
270 exact motif matching method was based on a 17 mer for each diagnostic SNP and a 22 mer  
271 for the diagnostic insertion and they were listed in S1 Dataset C & D.

272

273 **Parasite cultures and competition experiment.** Twelve clinical isolates paired to bone  
274 marrow samples were cultivated on HOMEM. Three *L. donovani* cloned strains were used in  
275 this experiment BPK067/0/cl2, BPK077/0/cl5, BPK091/0/cl9, respectively belonging to the  
276 ISC3, ISC6, and ISC4 genetic groups [8]. The parasites were grown on Tobie's blood agar [21]  
277 with a saline overlay at 26°C to mimic the growth conditions during parasite isolation from  
278 clinical samples [22]. The parasites were inoculated to the concentration of  $5 \times 10^5 \text{ ml}^{-1}$ , and  
279 passaged to fresh medium every 3-4 days. For each strain mixture, 3 replicates were  
280 prepared, and the pure strains were grown in duplicates. The proportion between two

281 parasites strains was roughly verified at the start of the experiment, and was further assessed  
282 approximately every 5 passages.

283 To follow the proportions between two different parasite strains in culture, a  
284 diagnostic SNPs, which allow distinction among different ISC genetic groups were used [23].  
285 Specifically, the Ld36\_p5263\_F1\* and Ld36\_p5263\_R1, and Ld33\_p3644\_F1 and  
286 Ld33\_p3644\_R1\* primer pairs were used to distinguish between ISC3 and reference, and ISC6  
287 and reference genotypes, respectively. The presence of these alleles was verified by standard  
288 Sanger sequencing, where primers mentioned above with \* were used to sequence the  
289 amplified products. PCR amplicons were sequenced at Baseclear (Leiden, The Netherlands)  
290 with ABI 3730 (XL) DNA Analyzer, and the chromatograms were analyzed using the 4peaks  
291 software (Nucleobytes). The ability to detect both alleles was first verified by sequencing the  
292 PCR products amplified from DNA mixed in the same proportions as the parasites in the  
293 competition experiment. With this method, it was not possible to detect the exact  
294 proportions of the two alleles, but the relations between them (i.e. which allele was present  
295 in higher proportion) was assessed.

296

297

298

## 299 **Results**

300

### 301 **SuSL-seq analysis of clinical samples: sequencing statistics**

302 Details on the SureSelect bait design are described in S1 Text and in S1 Fig. A. SuSL-  
303 seq was optimized on artificial mixtures (*Leishmania* DNA diluted in mammalian DNA in  
304 different ratios: see details and metrics in S1 Text and S1 Fig. B-C and S2 Fig.): a percentage

305 of *Leishmania* DNA of 0.006% was found to be the lowest limit for suitable analysis of genome  
306 diversity. SuSL-seq was then applied to 63 clinical samples with *Leishmania* DNA percentage  
307 of at least 0.006%, 59 bone marrow and 4 splenic aspirate samples collected from VL patients  
308 in Nepal (S1 Table) in the same region where we previously studied genome diversity of *L.*  
309 *donovani* isolates (S3 Fig.).

310         Among all SuSL-seq samples, the median depth of reads mapped against the *L.*  
311 *donovani* reference genome was 22.5, the 5<sup>th</sup> and 95<sup>th</sup> percentiles of median depth were 2  
312 and 74.16, respectively, while the maximum depth was 126.5 (in BPK89BM) and the minimum  
313 average depth was 0.074 (in BPK161BM). Across all clinical SureSelect libraries, the mean  
314 percentage of reference genome bases covered by at least 5 reads was 61.1% and, the mean  
315 percentage of bases covered by at least 1 read was 78.4%. This coverage average was skewed  
316 by a small number of lower-quality samples. For instance, within a sequencing batch of 24  
317 samples, over 90% of the genome was covered by at least one read in 14 samples; in all cases  
318 better genome representation was obtained following SureSelect enrichment (S4 Fig. A).  
319 Overall, as for the artificial mixtures, we obtained the highest enrichment for samples with  
320 lowest parasite loads. An approximately linear relationship was found between *Leishmania*  
321 DNA percentage in clinical samples and the proportion of reads mapping to *Leishmania* after  
322 SuSL-seq for samples with up to 1 % of *Leishmania* DNA (Fig. 1A). For samples with higher  
323 *Leishmania* content, no further increase was observed beyond around 60-70% of reads  
324 aligning to BPK282v2 reference genome (Fig. 1A). Eleven samples had low coverage, with less  
325 than 10% of the genome covered at a depth of 5x (Fig. 1B). These low-coverage samples also  
326 had the lowest parasite load, and were excluded from the analyses described below, so 52  
327 samples were studied in greater detail.

328

329 **Fig. 1. Performance of SuSL-sequencing on clinical samples. A.** Enrichment of *Leishmania*  
330 DNA from clinical samples by SureSelect; Y axis shows percentage of reads mapping to the *L.*  
331 *donovani* reference genome following SureSelect enrichment. X axis is the pre-enrichment  
332 percentage of *Leishmania* DNA, estimated by either whole-genome sequencing or qPCR;  
333 dotted lines indicate no enrichment and 10-, 100- and 1000-fold enrichment. **B.** Read mapping  
334 statistics in the 63 samples after SureSelect enrichment. Upper panel shows evenness of  
335 genome coverage as the proportion of bases covered with a minimum of number of  
336 sequencing reads from 1 to 100 as indicated by the seven different lines. Lower panel shows  
337 the percentage of reads mapping to the *Leishmania* reference genome for each sample,  
338 shown on the x-axis. The x-axis is common to both panels. BM, Bone Marrow; SP, Spleen  
339 aspirate.

340

341

#### 342 **SuSL-seq analysis of clinical samples: genetic variants**

343 Using an improved version of the BPK282 reference genome BPK282v2 [11], we were  
344 able to call SNPs in these 52 samples, of which 51 were identified as belonging to CG and one  
345 belonging to the genetically distinct ISC1 sub-population [8]. We identified 197 variable sites  
346 that had sequence coverage and could therefore be reliably genotyped in all 51 CG clinical  
347 samples; these sites were also characterized in 191 previously sequenced parasite isolates  
348 from the CG [8] and 9 newly sequenced isolates (see below). The 197 sites were sufficient to  
349 reconstruct a phylogeny consistent with our previously published analysis [8], placing all  
350 clinical SureSelect samples within the previously identified ISC diversity for *L. donovani* (dots  
351 in Fig. 2A). Out of the 51 CG samples, 40 clustered in one of the previously defined groups  
352 (ISC3-6, and ISC9). Five samples clustered at the base of ISC4. Six clinical samples, clustered

353 with isolates previously designated as ‘ungrouped’ (Fig.2A and S5 Fig. A-B), forming a novel  
354 monophyletic group that we have named ISC11. We verified the accuracy of our experimental  
355 and bio-informatic pipeline by including in the phylogenomic analyses SuSL-seq data from  
356 artificial mixtures (DNA of BPK282 diluted in human DNA): as expected, they clustered in the  
357 ISC6 group with the original BPK282 sequence data (not shown).

358

359 **Fig. 2. Genomic diversity among clinical samples. A.** SNPs. Phylogenetic tree based on  
360 SureSelect enriched clinical samples (black circle) and previously sequenced isolates [8].  
361 Diagram is a neighbor-joining phylogeny based on 197 variable sites. ISC2-ISC10 were sub-  
362 populations previously defined [8]; ISC11 is a novel group that includes clinical samples and  
363 isolates previously designated as ‘ungrouped’. Full sample identifiers are shown in Fig. S5A.  
364 **B.** Karyotypes (High quality samples). Y axis shows normalized somy estimate for each  
365 chromosome (x axis). Points show central estimate and bars show one standard deviation  
366 around these estimates, calculated by the binned depth method. **C.** Local CNVs. Average copy  
367 number per cell of H- and M-loci per ISC group in SureSelect enriched clinical samples (Bone  
368 Marrow or Spleen aspirate; BM/SP) and in cultured isolates (promastigotes, Prom). Error bars  
369 show one standard deviation around the mean estimate. Only a single sample was available  
370 from bone marrow aspirates in ISC1, hence no standard deviation is shown.

371

372 Notably, among the 11 samples that were excluded from the phylogenomic analysis  
373 because of poor genome-wide coverage, nine could be attributed to a specific ISC group, on  
374 the basis of diagnostic SNPs specific to these groups (labeled with \* in S1 Table). The  
375 remaining two samples, BPK211BM and BPK161BM, had sequence data with too low  
376 coverage for any genotyping (S1 Dataset E). Analysis of genotype distribution per village



377 revealed sympatric genotypic diversity: for instance, in Itahari, four different ISC types were  
378 sampled over 11 days in June 2002 and three were sampled over four months in 2003 (S1  
379 Dataset F). Interestingly, in this village, two cohabiting members of the same family were  
380 sampled during each of these two periods: in both cases, two different ISC types were  
381 identified. We also searched for small indels that were unique to clinical samples. We  
382 identified six unique indels: five were located in non-coding regions, and one introduced a 1-  
383 bp frameshift in the *LdAQP1* gene (S1 Dataset G).

384         Next, we examined chromosome copy numbers. Consistent with our observations in  
385 artificially mixed samples (S1 Text), the apparent accuracy of our somy estimates in clinical  
386 samples depended on the *Leishmania* DNA percentages, as those with low percentage had  
387 lower normalized read depth and genome coverage (S1 Dataset E). For example, chromosome  
388 31 is known to be tetrasomic in all *Leishmania* species and isolates sequenced so far, except  
389 under experimental drug resistance selection where somy can be even higher [9]. As  
390 expected, S-values (normalized coverage depth, see Methods) of chromosome 31 were close  
391 to 4 in samples with high genome coverage. These values, however, were lower in samples  
392 with lower genome coverage, even though the somy of chromosome 31 was distinctively  
393 higher than 2 except for the very lowest coverage samples. To distinguish real somy variation  
394 and technical artefacts, we classified samples into group of similar genome coverage into  
395 those with high (36 samples, genome coverage above 89.1%), medium (16 samples, coverage  
396 56.6-86.9%) and low quality (9 samples, coverage 9.8%-45.8%) somy calls (S1 Dataset A and  
397 S6 Fig. A). Two samples (coverage 1.1% and 0.8%), were excluded from this analysis because  
398 their depth was too low to quantify somy. The high-quality samples provided a clear picture  
399 of the average ploidy of amastigote populations in human hosts: most chromosomes showed  
400 an S-value around 2 (thus overall disomic), with only chromosome 31 showing consistently

401 high some around 4 (Fig. 2B). Other exceptions were chromosomes 16 and 18 which showed  
402 S-value of 1 (thus overall monosomic) in BPK89BM, and in BPK146BM, respectively (Fig. 2B  
403 and S6 Fig. A1). Chromosome 17 showed a S-value of 1 or lower than 2 (suggestive of  
404 mosaicism between monosomic and disomic variants) in seven samples: BPK276BM,  
405 BPK104BM, BPK146BM, BPK161BM, BPK198BM, BPK191BM, BPK4BM (Fig. 2B and S6 Fig. A1-  
406 3). We detected S-values between 2 and 3 (potentially indicating the presence of mosaicism  
407 between disomic and trisomic variants) of chromosome 20, 23, 32 and 33 in BPK821BM. (S6  
408 Fig. A1).

409 We detected two main local copy number variants (CNVs) specific of CG (termed M-  
410 and H-locus, [8]) in all 51 SuSL-seq CG samples. When we compared average normalized  
411 depth for these two CNVs between clinical and previously published promastigote samples  
412 for each genetic group, we found good agreement for M-locus with correlation  $R^2=0.941$  and  
413  $p\text{-value}=2.96 \times 10^{-4}$ , and slightly lower depth for H-locus in clinical samples with correlation  
414  $R^2=0.571$ ,  $p\text{-value}=4.84 \times 10^{-2}$  (Fig. 2C). The ISC1 group contained many other CNVs that were  
415 used to test the accuracy of local depth measured in SureSelect platform. We found  
416 correlation ( $R^2=0.9921$ ,  $p\text{-value}=5.3449\text{e-}14$ ) between the depth in the ISC1-specific CNVs in  
417 the previously analyzed promastigote samples and the depth in the BPK72BM clinical sample  
418 (S6 Fig. B).

419

## 420 **Comparison of paired clinical and cultured isolate samples**

421 For 12 of the SuSL-seq clinical samples, paired cultured parasite isolates derived from  
422 the same clinical material were available. We compared the genotypes within each of these  
423 12 pairs, at three levels: SNPs, indels and chromosome copy number. SNP analysis revealed  
424 that nine SuSL-seq samples were assigned to different ISC genotype groups to the matched

425 cultured isolates (Table 1), with samples assigned to different core group genotypes differing  
426 by 9-26 homozygous sites and 3-13 heterozygous positions. In two cases, the clinical samples  
427 were genotyped as being in the CG and the isolate was assigned to ISC1; these pairs of  
428 samples were far more distinct, differing in 29942 and 34146 homozygous SNPs and 4370 and  
429 167 heterozygous sites respectively. For the 3 paired samples with matching ISC genotypes,  
430 we found only minor nucleotide differences (0-9 homozygous and 3-7 heterozygous SNPs).  
431 We found differences in Indel variants in 10 out of 12 samples: in one of them (BPK081) a  
432 single base insertion was observed in LdAQP1 (described in detail above) in the bone marrow,  
433 which was not present in the paired culture (Table 1). Finally, chromosome copy number  
434 differed in 10 paired samples, while in BPK087 and BPK081 we found no significant  
435 differences in some values, and parasites remained overall disomic in culture (Fig. 3A).  
436 Accordingly, none of the 12 paired samples revealed identical genomic features between the  
437 clinical samples and the derived isolates.

438

439 **Fig. 3. Somy comparison between matched clinical samples and culture parasites. A.**

440 Inferred somy for 3 samples for which SureSelect-enriched bone marrow (BM) samples and  
441 cultured isolates (MO) from the same patients had matching ISC genotypes. Y axis shows  
442 normalized somy estimate for each chromosome (x axis). Points show central estimate and  
443 bars show one standard deviation around these estimates. Somy estimates and standard  
444 deviations for the bone marrow samples were based on the binned depth method while  
445 corresponding values for isolates were based on depth of each position. **B.** Evidence for  
446 polyclonal infections. Bars represent the proportion of sequencing reads showing the ISC-  
447 specific genotype or the reference (REF) genotype at loci with ISC-specific alleles. 1)

448 Genotypes at ISC9 and ISC4 loci for SureSelect-enriched bone marrow sample (BPK471BM).

449 2) Genotypes at ISC4 and ISC3 loci for SureSelect-enriched bone marrow sample BPK296BM.

450

451 **Table 1. Genotype differences observed in 12 paired samples: clinical samples analyzed by**

452 **SureSelect and derived isolates sequenced classically.** Total base difference\* = Homozygous

453 difference x 2 + Heterozygous difference. Almost diploid\*\*: S-value was 2 in all chromosomes

454 except the tetrasomic chromosome 31. Notes: (1) the S-values of chromosome 11 in all bone

455 marrow samples were slightly higher due to amplification artefact and therefore, their values

456 were assumed to be disomic. (2) The S-values of chromosome 31 of BPK87BM and BPK80BM

457 were lower than the expected tetrasomic values due to lower genome coverage.

458

| Clinical sample ISC genotype | Derived isolate ISC genotype | Total base difference* | Homozygous difference | Heterozygous difference | Indel difference                    | Karyotype (bone marrow) | Karyotype (derived isolate)                                                     |
|------------------------------|------------------------------|------------------------|-----------------------|-------------------------|-------------------------------------|-------------------------|---------------------------------------------------------------------------------|
| ISC4                         | ISC6                         | 47                     | 20                    | 7                       | 4                                   | almost diploid**        | trisomy on ch5 and 11                                                           |
| UG                           | ISC4                         | 42                     | 17                    | 8                       | 3                                   | almost diploid          | trisomic on ch2, 4, 7, 8, 9, 11, 12, 20, 26, 33 and 35. tetrasomic on ch23      |
| ISC6                         | ISC4                         | 55                     | 21                    | 13                      | 4                                   | almost diploid          | regular                                                                         |
| ISC3                         | ISC4                         | 36                     | 14                    | 8                       | 8                                   | almost diploid          | trisomic on ch20, 26 and 33                                                     |
| ISC3                         | ISC1                         | 68459                  | 34146                 | 167                     | 6275                                | almost diploid          | monosomic on ch17                                                               |
| ISC4                         | ISC1#                        | 64254                  | 29942                 | 4370                    | 8281                                | almost diploid          | trisomic on ch23, 33 and 35                                                     |
| ISC9                         | ISC5                         | 55                     | 26                    | 3                       | 3                                   | almost diploid          | trisomic on ch2, 5, 8, 9, 11, 12, 13, 14, 20, 23, 27 and 32. tetrasomic on ch33 |
| ISC5                         | ISC4                         | 40                     | 18                    | 4                       | 1                                   | monosomic on ch17       | trisomic on ch4, 11, 20, 23. tetrasomic on ch5                                  |
| ISC4                         | UG                           | 21                     | 9                     | 3                       | 4                                   | almost diploid          | trisomic on ch1, 7, 8, 10, 13, 15, 20, 22, 23. tetrasomic on ch9                |
| ISC4                         | ISC4                         | 13                     | 3                     | 7                       | LdAQP1: frameshift<br>G/GAinsertion | almost diploid          | regular                                                                         |
| ISC6                         | ISC6                         | 5                      | 0                     | 5                       | 0                                   | almost diploid          | trisomic on ch8, 9, 13 and 23                                                   |
| ISC4                         | ISC4                         | 11                     | 1                     | 9                       | 0                                   | almost diploid          | trisomic on ch1, 7, 8, 10, 13, 15, 20, 22 and 23. tetrasomic on ch9             |

459

460

461 We then focused on the nine paired samples for which different ISC types were

462 detected in the bone marrow and the derived isolates. Considering the sympatric ISC

463 genotype diversity highlighted above, it is possible that some patients harbor polyclonal

464 infections, with a given genotype dominant in a human host and another one dominant in

465 culture, because of fitness differences in the respective environments. This possibility was  
466 explored by further genetic analyses and by competition experiments.

467 First, we found a second and minor genotype in the SuSL-seq mapped reads of two  
468 clinical samples (BPK471BM and BPK296BM), at a proportion estimated as 9.2%, and 6%,  
469 respectively (Fig.3B). We also found the evidence of polyclonality in one of the cultured  
470 isolates, which differed in its ISC genotype from the paired clinical sample (Table 1): in  
471 BPK157MO, ISC1 constituted the main genotype (93.85% of the reads), and we found 6.15%  
472 that were not ISC1 at all ISC1 specific SNP sites. Secondly, we tested for the presence of more  
473 than one genotype in un-enriched clinical samples by applying ISC single locus genotyping  
474 (ISC-SLG) combined with NGS-based deep amplicon sequencing using four previously  
475 described diagnostic SNPs/insertion allowing discrimination between the ISC3, ISC4, ISC5 and  
476 ISC6 genotypes [23]. Short regions flanking the SNP/indel were amplified, sequenced and the  
477 frequency of both alleles in all the tested samples was estimated. In order to increase the  
478 chance of detecting the presence of minor genotypes, we selected clinical samples with the  
479 highest parasite loads and/or highest total DNA contents. In addition, we included polyclonal  
480 clinical samples BPK471BM and BPK296BM (see above), two clinical sample-isolate pairs  
481 (BPK077 and BPK276) and cloned lines, which served as positive or negative controls of the  
482 presence of polymorphism at the diagnostic SNP/indel sites. The estimated percentage of  
483 *Leishmania* DNA and number of *Leishmania* genome equivalents in the clinical samples varied  
484 between 0.05-2.85%, and 12-60901, respectively (S1 Dataset A). We could confirm the  
485 principal ISC genotypes defined by SuSL-seq in all clinical samples (S1 Dataset A). Alternative  
486 alleles containing SNP variants could be observed in most of the clinical samples, but their  
487 frequency was not significantly different from the frequency found in the control cloned lines  
488 (S7 Fig. and S1 Dataset A). For the AQP1 insertion, the situation was similar with the exception

489 of the sample BPK120BM (defined as belonging to ISC9), which indicated the presence of a  
490 small population of ISC5 genotype (z-score:3.2; p-value: 0.0014). The reciprocal was found in  
491 BPK276BM, an ISC5 sample in which a small proportion of WT alleles was encountered and  
492 we found no alleles containing the ISC5-specific AQP1 insertion in the paired clinical isolate.  
493 Although these results are not significant (p-value: 0.139), they are consistent with the  
494 observed ISC5 genotype in BPK276BM, and ISC6 genotype in the derived isolate (S1 Dataset  
495 A).

496 Finally, to test whether different growth rates could explain the different genotypes  
497 observed between direct clinical samples and those grown *in vitro*, we set up a growth-  
498 competition experiment. We inoculated flasks with cloned strains BPK091 and BPK077 (ISC4  
499 and ISC6, respectively), and BPK067 and BPK091 (ISC3, and ISC4, respectively) together in the  
500 following ratios (strain1/strain2): 90/10, 50/50, and 10/90. Using Sanger sequencing to  
501 monitor the presence of diagnostic SNPs that could distinguish the two genetic groups at  
502 different time points during *in vitro* cultivation, we were able to detect which of the two co-  
503 cultured strains was dominant. We reproducibly observed for both parasite combinations  
504 that one strain consistently dominated the culture, even if it was only present as 10% of the  
505 initial inoculum (S8 Fig.). Interestingly, BPK091, which was present in both mixes, became  
506 dominant after 21 passages when co-cultured with BPK077 but after only five passages it was  
507 out-competed by BPK067.

508

509

## 510 Discussion

511 We demonstrated here proof-of-principle for the sequencing of *Leishmania* genomes  
512 directly from clinical samples of patients with VL. Tested on 63 clinical samples from Nepal,  
513 SuSL-seq showed a high analytical sensitivity: we were able to (i) perform phylogenomic  
514 analyses on 82.5% of samples, (ii) assign 97% of samples to previously defined ISC genotypes  
515 using a set of diagnostic SNPs, (iii) estimate chromosome copy number in 82.5% of samples  
516 and (iv) identify large local CNVs in 83%. With the current design of the baits, our method  
517 should be applicable to all the parasites causing visceral leishmaniasis i.e. *L. infantum* and *L.*  
518 *donovani*, in East Africa, the Mediterranean basin and Latin America. Further work is required  
519 to test SuSL-seq on other host samples (animal reservoir, insect vectors, or different host  
520 tissues). It would be desirable to improve its performance in *Leishmania* samples with low  
521 parasite load and/or low amount of total DNA: here, the combination of SureSelect with other  
522 enrichment methods might prove useful.

523 Our study sheds new light on the biology of *Leishmania* in the human host. A first  
524 aspect concerned the karyotype of amastigotes. Massive aneuploidy has been described in  
525 cultivated *Leishmania* promastigotes of all species [24]. In particular, sequencing of 204 *L.*  
526 *donovani* genomes [8] revealed strong differences in karyotype between parasite strains, with  
527 a baseline overall disomy and up to 22 polysomic chromosomes (essentially 3N and 4N) in  
528 single strains. In sharp contrast, we did not find high levels of aneuploidy in the amastigotes  
529 present in clinical samples of the same region. Besides chromosome 31 which is constitutively  
530 tetrasomic in all *Leishmania* species, most chromosomes in amastigotes of clinical samples  
531 were inferred to be disomic, and only a few monosomic or with intermediate coverage depth,  
532 the latter likely reflecting mosaic aneuploidy in the analyzed parasite populations, with  
533 mixtures of cells of different karyotypes [25]. Overall, the differences in aneuploidy observed

534 between clinical samples and derived isolates are consistent with our previous findings where  
535 we reported close to diploid karyotype in parasites adapted to Syrian golden hamster, and  
536 highly dynamic aneuploidy during propagation of *L. donovani* in vitro [11]. This genomic  
537 plasticity was mirrored at transcriptome level and might provide a rapid adaptation in  
538 response to environmental cues.

539 A second potential finding is related to the observed genotypic differences between  
540 12 clinical samples and derived cultured isolates. Strictly speaking and considering different  
541 types of genetic variants (SNPs, indels and somy), none of the 12 isolates showed an identical  
542 genotype to the parasites present in the paired bone marrow samples. We cannot exclude  
543 that the 1-nt indel in the *LdAQP1* of BPK81BM 'mutated' during culture maintenance and  
544 restored the reading frame in the corresponding isolate's genome. However, knowing that  
545 frame shifts in this gene have been linked to *Leishmania* antimony resistance [8], this result  
546 shows the risk of losing drug resistance markers when genotyping isolates. The differences in  
547 karyotype as observed in 11/12 paired samples could also be acquired during culture, but  
548 could also have resulted from selection from a mosaic background, as shown experimentally  
549 [25]. More generally, however, the SNP differences that led to isolates and SuSL-seq samples  
550 representing different ISC genotypes did not appear to be explained by mutations appearing  
551 *in vitro*; each ISC group is characterized by a set of diagnostic SNPs and the observed switch  
552 of ISC genotypes concerned all diagnostic SNPs in these sample pairs. In two cases, the isolate  
553 and clinical samples differed at tens of thousands of sites, and clearly represented the two  
554 very different populations of parasites circulating in VL patients in Nepal. We excluded SNP-  
555 calling artefacts, and the clinical work followed specific procedures for labeling, processing  
556 and tracking all samples. Thus, excluding experimental mistakes as the reason for these  
557 results, the most likely explanation is polyclonality of the infection in the host. In such a



558 scenario, different clones would be most abundant in the host and the promastigote culture  
559 medium, due to their differences in respective fitness in these two environments.

560 We have attempted to verify the polyclonality hypothesis through a set of direct and  
561 indirect experiments. On one hand, in two clinical samples and one cultured isolate we  
562 detected minor reads (above 6%) with the signature of a second ISC genotype. We also tried  
563 to detect the second genotype directly in selected bone marrow samples with amplicon  
564 sequencing of 4 loci, which contain SNPs/AQP1 indel specific for different genetic groups from  
565 ISC. However, we were unable to find any statistically robust evidence for presence of a  
566 second genotype with this method, except in one case, BPK120BM. This is most likely due to  
567 a sensitivity issue of the amplicon sequencing method which was applied: (i) without  
568 enrichment (in most cases, in presence of more than 99% of human DNA, Dataset S1D), (ii) to  
569 find minor variants and (iii) targeting one single variant within (iv) a single copy gene. The two  
570 clinical samples BPK296BM and BPK471BM illustrate this problem well: they were clearly  
571 shown to be polyclonal from SuSL-seq data, while the second clone could not be detected  
572 from amplicon sequencing, most likely due to the low number of *Leishmania* genome  
573 equivalents (respectively, 43 and 12). On the other hand, the plausibility of this hypothesis  
574 was indirectly validated by a competition experiment in which we co-cultivated strains of  
575 different ISC genotypes in the same tube: even if a strain constituted only 10% of the initial  
576 inoculum, it could rapidly and in a reproducible way dominate over time in culture.

577 Further work is required to assess the extent of polyclonality among *L. donovani*  
578 infections. The phenomenon is common in *Plasmodium*, especially in high transmission areas  
579 [26]. Among trypanosomatids, it has been reported in *Trypanosoma cruzi*, where among  
580 others multiple genotypes were found to be transmitted congenitally [27] and temporal  
581 variation of genotypes was observed in asymptomatic carriers [28]. In *Leishmania*, mixed

582 infections of different species were reported in wild rodents [29], horses [30] and humans  
583 [31,32]. A recent study documented the possibility of polyclonality in *L. donovani* from East  
584 Africa, as different genotypes were isolated from different organs of the same patient [33]. A  
585 similar observation was made on a Spanish dog in which two different zymodemes of *L.*  
586 *infantum* were collected from the skin and a lymph node [34]. Furthermore, natural  
587 *Leishmania* hybrids are regularly reported all over the world (see for instance [35,36]) and in  
588 our previous study in the ISC [8], we found 8 isolates of hybrid origin (out of 192 isolates of  
589 the CG, i.e. 4.2%). This could only occur in sand flies as a result of polyclonal infections.

590         The present work highlights the complexity of *L. donovani* infections in the human  
591 host. It appears that a patient can be infected by multiple clones showing different genotypes,  
592 which possibly vary at the somy level. This genetic diversity could offer an adaptive advantage  
593 to the whole population of cells, by providing ‘individual’ solutions to different environments,  
594 leading to different dominant genomes in the patient and in culture. We showed that this did  
595 not have a major impact so far for phylogenomic studies. However, if any link is to be made  
596 between parasite genome variation and clinical phenotypes – for example treatment  
597 outcome or pathogenicity – analyzing *Leishmania* directly from clinical samples is necessary,  
598 as both the genotype and aneuploidy in the mammalian host and in vitro culture can differ.

599

600         **Data Release.** Raw data was deposited in the European Nucleotide Archive (ENA)  
601 with the accession number ERP110990

602

603

604

605

606

## 607 **Acknowledgements**

608 This study was supported by the European Commission (EC-FP-222895), Belgian Science  
609 Policy Office (TRIT, P7/41), Flemish Fund for Scientific Research (G.O.B81.12), and Department  
610 of Economy, Science and Innovation in Flanders ITM-SOFIB (SINGLE project, to J.C.D., M.V.A.  
611 and M.A.D.). MB, MJS and JAC are supported by Wellcome via their core support for the  
612 Wellcome Sanger Institute (grant 206194). We acknowledge the support of the core pipeline  
613 staff at WSI, in particular Peter Ellis and Sara Widaa, and the help of Owen Hardy from Agilent  
614 technologies for assistance in designing the SureSelect array. The funders had no role in study  
615 design, data collection and analysis, or preparation of the manuscript.

616

617

## 618 **Competing interests**

619 The authors declare that no competing interests exist.

620

621

## 622 **References**

623 1. Burza S., Croft S.L., Boelaert M. (2018). Leishmaniasis. *Lancet* 392:951-970.

624 [https://doi.org/10.1016/S0140-6736\(18\)31204-2](https://doi.org/10.1016/S0140-6736(18)31204-2)

625 2. Alvar J., Vélez I.D., Bern C., Herrero M., Desjeux P., Cano J. et al. (2012).

626 Leishmaniasis worldwide and global estimates of its incidence. *PLoS One* 7:e35671.

627 <https://doi.org/10.1371/journal.pone.0035671>

- 628 3. Rijal S., Sundar S., Mondal D., Das P., Alvar J., Boelaert M. (2019). Eliminating visceral  
629 leishmaniasis in South Asia: the road ahead. *British Medical Journal* 364:k5224.  
630 <https://www.bmj.com/content/364/bmj.k5224>
- 631 4. Dujardin J.C., Decuyper S. (2013). Epidemiology of leishmaniasis in the time of drug  
632 resistance. In: Drug Resistance in *Leishmania* Parasites. Consequences, Molecular  
633 Mechanism and Possible Treatments. Eds Ponte-Sucre A, Padron-Nieves M, Diaz E.  
634 Springer-Verlag, Wienen. pp 65-83. [https://doi.org/10.1007/978-3-7091-1125-3\\_4](https://doi.org/10.1007/978-3-7091-1125-3_4)
- 635 5. Dujardin J.C. (2018). Epidemiology of leishmaniasis in the time of drug resistance  
636 (the Miltefosine era). In: Drug resistance in *Leishmania* parasites: consequences,  
637 molecular mechanisms and possible treatments. Eds Ponte-Sucre A & Padron-Nieves  
638 M. Springer International Publishing, pp 85-107. [https://doi.org/10.1007/978-3-319-74186-4\\_4](https://doi.org/10.1007/978-3-319-74186-4_4)
- 639
- 640 6. Cuypers B., Berg M., Imamura H., Dumetz F., De Muylder G., Domagalska M.A. et al.  
641 (2018). Integrated genomic and metabolomic profiling of ISC1, an emerging  
642 *Leishmania donovani* population in the Indian subcontinent. *Infection Genetics and*  
643 *Evolution* 62:170-178. <https://doi.org/10.1016/j.meegid.2018.04.021>
- 644 7. Karunaweera N.D., Ferreira M.U. (2018). Leishmaniasis: current challenges and  
645 prospects for elimination with special focus on the South Asian region. *Parasitology*.  
646 145:425-429. <https://doi.org/10.1017/S0031182018000471>
- 647 8. Imamura H., Downing T., Van den Broeck F., Sanders M.J., Rijal S., Sundar S. et al.  
648 (2016). Evolutionary genomics of epidemic visceral leishmaniasis in the Indian  
649 subcontinent. *Elife* 5:e12613. <https://doi.org/10.7554/eLife.12613.001>
- 650 9. Dumetz F., Cuypers B., Imamura H., Zander D., D'Haenens E., Maes I. et al. (2018).  
651 Molecular Preadaptation to Antimony Resistance in *Leishmania donovani* on the

- 652 Indian Subcontinent. *mSphere* 3:e00548-17.
- 653 <https://doi.org/10.1128/mSphere.00548-17>
- 654 10. Ostyn B., Gidwani K., Khanal B., Picado A., Chappuis F., Singh S.P. et al. (2011).
- 655 Incidence of symptomatic and asymptomatic *Leishmania donovani* infections in high-
- 656 endemic foci in India and Nepal: a prospective study. *PLoS Neglected Tropical*
- 657 *Diseases* 5:e1284. <https://doi.org/10.1371/journal.pntd.0001284>
- 658 11. Dumetz F., Imamura H., Sanders M., Seblova V., Myskova J., Pescher P. et al. (2017).
- 659 Modulation of Aneuploidy in *Leishmania donovani* during Adaptation to Different In
- 660 Vitro and In Vivo Environments and Its Impact on Gene Expression. *MBio* 8:e00599-
- 661 17. <https://doi.org/10.1128/mBio.00599-17>
- 662 12. Cuypers B. (2018). A systems biology approach for a comprehensive understanding
- 663 of molecular adaptation in *Leishmania donovani*. PhD thesis, University of Antwerp.
- 664 <https://anet.be/record/opacuantwerpen/c:lvd:14740884/E>
- 665 13. Feehery G.R., Yigit E., Oyola S.O., Langhorst B.W., Schmidt V.T., Stewart F.J. et al.
- 666 (2013). A method for selectively enriching microbial DNA from contaminating
- 667 vertebrate host DNA. *PLoS One* 8:e76096.
- 668 <https://doi.org/10.1371/journal.pone.0076096>
- 669 14. Oyola S.O., Ariani C.V., Hamilton W.L., Kekre M., Amenga-Etego L.N., Ghansah A. et
- 670 al. (2016). Whole genome sequencing of *Plasmodium falciparum* from dried blood
- 671 spots using selective whole genome amplification. *Malaria Journal* 15:597.
- 672 <https://doi.org/10.1186/s12936-016-1641-7>
- 673 15. Doyle R.M., Burgess C., Williams R., Gorton R., Booth H., Brown J. et al. (2018). Direct
- 674 Whole-Genome Sequencing of Sputum Accurately Identifies Drug-Resistant

- 675 *Mycobacterium tuberculosis* Faster than MGIT Culture Sequencing. *Journal of Clinical*  
676 *Microbiology* 56:e00666-18. <https://doi.org/10.1128/JCM.00666-18>
- 677 16. Kozarewa I., Ning Z., Quail M.A., Sanders M.J., Berriman M., Turner D.J. (2009).  
678 Amplification-free Illumina sequencing-library preparation facilitates improved  
679 mapping and assembly of (G+C)-biased genomes. *Nature Methods* 6:291-5.  
680 <https://doi.org/10.1038/nmeth.1311>
- 681 17. Bronner I.F., Quail M.A., Turner D.J., Swerdlow H. (2014). Improved Protocols for  
682 Illumina Sequencing. *Current Protocols of Human Genetics* 80:18.2.1-42.  
683 <https://doi.org/10.1002/0471142905.hg1802s80>
- 684 18. Downing T., Imamura H., Decuypere S., Clark T.G., Coombs G.H., Cotton J.A. et al.  
685 (2011). Whole genome sequencing of multiple *Leishmania donovani* clinical isolates  
686 provides insights into population structure and mechanisms of drug resistance.  
687 *Genome Research* 21:2143-56. <https://doi.org/10.1101/gr.123430.111>
- 688 19. Tamura K., Peterson D., Peterson N., Stecher G., Nei M., Kumar S. (2011). MEGA5:  
689 molecular evolutionary genetics analysis using maximum likelihood, evolutionary  
690 distance, and maximum parsimony methods. *Molecular Biology and Evolution*  
691 28:2731-9. <https://doi.org/10.1093/molbev/msr121>
- 692 20. Huson D.H., Bryant D. (2006). Application of phylogenetic networks in evolutionary  
693 studies. *Molecular Biology and Evolution* 23:254-67.  
694 <https://doi.org/10.1093/cid/cit102>
- 695 21. Tobie, E. J., Von Brand, T. & Mehlman, B. (1950). Cultural and physiological  
696 observations on *Trypanosoma rhodesiense* and *Trypanosoma gambiense*. *Journal of*  
697 *Parasitology* 36:48-54.

- 698 22. Yardley V., Croft S.L., De Doncker S., Dujardin J.C., Koirala S., Rijal S. et al. (2005). The  
699 sensitivity of clinical isolates of *Leishmania* from Peru and Nepal to miltefosine.  
700 *American Journal of Tropical Medicine and Hygiene* 73:272-5.
- 701 23. Rai K., Bhattarai N.R., Vanaerschot M., Imamura H., Gebru G., Khanal B. et al. (2017).  
702 Single locus genotyping to track *Leishmania donovani* in the Indian subcontinent:  
703 Application in Nepal. *PLoS Neglected Tropical Diseases* 11:e0005420.  
704 <https://doi.org/10.1371/journal.pntd.0005420>
- 705 24. Rogers M.B., Hilley J.D., Dickens N.J., Wilkes J., Bates P.A., Depledge D.P. et al.  
706 (2011). Chromosome and gene copy number variation allow major structural change  
707 between species and strains of *Leishmania*. *Genome Research* 21:2129-42.  
708 <https://doi.org/10.1101/gr.122945.111>
- 709 25. Prieto Barja P., Pescher P., Bussotti G., Dumetz F., Imamura H., Kedra D. et al. (2017).  
710 Haplotype selection as an adaptive mechanism in the protozoan pathogen  
711 *Leishmania donovani*. *Nature Ecology and Evolution* 1:1961-1969.  
712 <https://doi.org/10.1038/s41559-017-0361-x>
- 713 26. Pacheco M.A., Lopez-Perez M., Vallejo A.F., Herrera S., Arévalo-Herrera M., Escalante  
714 A.A. (2016). Multiplicity of Infection and Disease Severity in *Plasmodium vivax*. *PLoS*  
715 *Neglected Tropical Diseases* 10:e0004355.  
716 <https://doi.org/10.1371/journal.pntd.0004355>
- 717 27. Llewellyn M.S., Messenger L.A., Luquetti A.O., Garcia L., Torrico F., Tavares S.B. et al.  
718 (2015). Deep sequencing of the *Trypanosoma cruzi* GP63 surface proteases reveals  
719 diversity and diversifying selection among chronic and congenital Chagas disease  
720 patients. *PLoS Neglected Tropical Diseases* 9:e0003458.  
721 <https://doi.org/10.1371/journal.pntd.0003458>

- 722 28. Sánchez L.V., Bautista D.C., Corredor A.F., Herrera V.M., Martinez L.X., Villar J.C. et al.  
723 (2013). Temporal variation of *Trypanosoma cruzi* discrete typing units in  
724 asymptomatic Chagas disease patients. *Microbes and Infection* 15:745-8.  
725 <https://doi.org/10.1016/j.micinf.2013.06.008>
- 726 29. Ferreira Ede C., Cruz I., Cañavate C., de Melo L.A., Pereira A.A., Madeira F.A., Valério  
727 S.A. et al. (2015). Mixed infection of *Leishmania infantum* and *Leishmania braziliensis*  
728 in rodents from endemic urban area of the New World. *BMC Veterinary Research*  
729 11:71. <https://doi.org/10.1186/s12917-015-0392-y>
- 730 30. Soares I.R., Silva S.O., Moreira F.M., Prado L.G., Fantini P., Maranhão Rde P. et al.  
731 (2013). First evidence of autochthonous cases of *Leishmania (Leishmania) infantum*  
732 in horse (*Equus caballus*) in the Americas and mixed infection of *Leishmania*  
733 *infantum* and *Leishmania (Viannia) braziliensis*. *Veterinary Parasitology* 197:665-9.  
734 <https://doi.org/10.1016/j.vetpar.2013.06.014>
- 735 31. Veland N., Valencia B.M., Alba M., Adui V., Llanos-Cuentas A., Arevalo J. et al.  
736 (2013). Simultaneous infection with *Leishmania (Viannia) braziliensis* and *L. (V.)*  
737 *lainsoni* in a Peruvian patient with cutaneous leishmaniasis. *American Journal of*  
738 *Tropical Medicine and Hygiene* 88:774-7 <https://doi.org/10.4269/ajtmh.12-0594>
- 739 32. Shirian S., Oryan A., Hatam G.R., Daneshbod Y. (2012). Mixed mucosal leishmaniasis  
740 infection caused by *Leishmania tropica* and *Leishmania major*. *Journal of Clinical*  
741 *Microbiology* 50:3805-8. <https://doi.org/10.1128/JCM.01469-12>
- 742 33. Zackay A., Cotton J.A., Sanders M., Hailu A., Nasereddin A., Warburg A. et al. (2018).  
743 Genome wide comparison of Ethiopian *Leishmania donovani* strains reveals  
744 differences potentially related to parasite survival. *PLoS Genetics* 14:e1007133.  
745 <https://doi.org/10.1371/journal.pgen.1007133>



- 746 34. Pratlong F., Portus M., Rispaill P., Moreno G., Bastien P., Rioux J.A. (1989).  
747 Simultaneous presence in dogs of 2 zymodemes of the *Leishmania infantum*  
748 complex. *Annales de Parasitologie Humaine et Comparée* 64:312-4.  
749 <https://doi.org/10.1051/parasite/1989644312>
- 750 35. Rogers M.B., Downing T., Smith B.A., Imamura H., Sanders M., Svobodova M. et al.  
751 (2014). Genomic confirmation of hybridisation and recent inbreeding in a vector-  
752 isolated *Leishmania* population. *PLoS Genetics* 10:e1004092.  
753 <https://doi.org/10.1371/journal.pgen.1004092>
- 754 36. Odiwuor S., De Doncker S., Maes I., Dujardin J.C., Van der Auwera G. (2011). Natural  
755 *Leishmania donovani/Leishmania aethiopica* hybrids identified from Ethiopia.  
756 *Infection Genetics and Evolution* 11:2113-8.  
757 <https://doi.org/10.1016/j.meegid.2011.04.026>  
758  
759  
760

761 **Supporting information**

762 **S1 Text.** Supplementary results: SureSelect bait design, SureSelect genome capture and  
763 sequencing (SuSL-seq) optimization on artificial mixtures; Direct sequencing of *Leishmania*  
764 *donovani* genomes in 63 clinical samples. Supplementary methods: clinical samples, amplicon  
765 sequencing. Supplementary references. (*S1Text.docx*)

766

767 **S1 Table. List of Nepalese clinical samples studied here:** date of sampling and geographical  
768 origin, type of sample, treatment received (AmB, Amphotericin B; SAG, Sodium Antimony  
769 Gluconate; MIL, Miltefosine) and outcome, ISC group (according to the results of current  
770 study), \*because of lower sequence quality, ISC genotype was defined based on a set of  
771 diagnostic SNPs, remarks about (i) treatment provided before admission or (ii) family links  
772 between patients, isolation outcome and code of successful paired isolates. (*available on*  
773 *request to authors*)

774

775 **S1 Fig. A. Distribution of probes across *L. donovani* BPK282 reference genome. Most of the**  
776 **reference genome is covered by only a single probe.** Some regions are not covered to avoid  
777 repetitive regions and regions with homology to mammalian hosts. Changes in the genome  
778 assembly subsequent to the bait design and the presence of additional probes to capture *L.*  
779 *infantum* have led to some regions being covered by multiple probes sequences. **B.** Much of  
780 the variation in depth in coverage in clinical samples is due to the presence of multiple probe  
781 sequences. Plots show the total coverage density across all clinical samples for regions of the  
782 reference genome covered by 0, 1, 2 or more probe sequences. **C.** Depth of read coverage in  
783 SureSelect enriched samples across two regions of the *Leishmania* genome. Lines show  
784 normalized coverage depth (actual coverage per base pair divided by genome-wide mean

785 coverage) for one clinical sample (BPK543, blue) and the sum for all clinical samples (orange).

786 Grey shading shows regions where SureSelect probes map to the genome. Mean coverage for

787 BPK452 was 9.2 reads, for the summed clinical samples 2447.8. (*S1toS8figs.pdf*)

788

789 **S2 Fig. Performance of SuSL-sequencing on artificial mixtures of *Leishmania* and mammal**

790 DNA at three different *Leishmania* DNA percentages: 0.06, 0.006 and 0.0006 %. **A.** Summary

791 statistics for sequencing data from these experiments, showing the total number of reads in

792 each library, the proportion of reads mapping to the *L. donovani* reference genome, and the

793 enrichment factor, calculated as the ratio of the proportion of reads mapping to *L. donovani*

794 in the SureSelect libraries to the proportion of *Leishmania* promastigote DNA included in the

795 pre-pulldown DNA mixtures. **B.** Evenness of genome coverage. The y-axis shows proportion

796 of bases covered with a minimum number of sequencing reads-- read depth along the x-axis

797 -- by reads samples from SureSelect sequencing data from artificial mixtures. 104M, 78M,

798 52M, 26M and 13M indicate the total number of reads (in millions) sampled from each library;

799 0.06, 0.006 and 0.0006 are the input proportions of *Leishmania* DNA in percent. For lower

800 *Leishmania* DNA percentages, the higher read depth did not result in higher genome base

801 coverage. **C.** Inferred somy from SureSelect on artificial mixtures. BPK282, pure DNA from

802 promastigote; LD06-0006, simulated clinical samples at three *Leishmania* DNA percentages

803 (0.06%, 0.006% and 0.0006% respectively). Y axis shows normalized somy estimate for each

804 chromosome (x axis). Points show central estimate and bars show one standard deviation

805 around these estimates from four replicates of each *Leishmania* DNA percentages 0.06%,

806 0.006%, 0.0006%, respectively. (*S1toS8figs.pdf*)

807

808 **S3 Fig. Map of Nepal showing geographical origin of clinical samples and cultured**  
809 **promastigote isolates.** Colours represent different genotype groups defined elsewhere [8].  
810 Circles represent Nepalese promastigote isolates from ref 8, crosses bone marrow and spleen  
811 samples. (*S1toS8figs.pdf*)

812

813 **S4 Fig. A. Genome sequencing of clinical samples: percentage of the genome covered by**  
814 **more than 1 read, with and without SuSL enrichment. B.** Relationship between qPCR  
815 estimate of *Leishmania* DNA concentration (y axis) and the proportion of sequencing reads  
816 mapping to the *L. donovani* reference genome before SureSelect enrichment in clinical  
817 samples for which both qPCR and pre-enrichment sequence data are available, confirming  
818 accuracy of the qPCR estimates. Batches were formed of samples with similar proportions of  
819 *Leishmania* DNA pre-enrichment. (*S1toS8figs.pdf*)

820

821 **S5 Fig. A. Phylogenetic tree (Neighbor-joining) based on bone marrow (BM), spleen (SP),**  
822 **isolates paired to clinical samples (MO) and previously sequenced lines (labelled A1 or B2,**  
823 **ref 8).** The tree is identical to the main one (Fig 2A), except that the labels of the samples are  
824 indicated. Bone marrow (BM) and spleen (SP) samples are labelled in blue; isolates that are  
825 paired to clinical samples are labelled in red, previously sequenced lines are labelled in black.  
826 ISC2-ISC10 were sub-populations previously defined (ref 8). See Fig.2A for comments on  
827 ISC11. **B.** Results from STRUCTURE analyses from five replicate runs (2x10<sup>6</sup> MCMC chains  
828 following 10<sup>6</sup> burn-in steps) under the Admixture model assuming 1-15 *K* clusters. The plot  
829 on the left shows the estimated loglikelihood of all runs for each *K* cluster. Barplots on the  
830 right summarize the assignment probabilities of every *L. donovani* sequence to each inferred

831 cluster assuming 5, 6, 7, 8 or 9 clusters. Arrows denote the CG samples sequenced in this  
832 study. (*S1toS8figs.pdf*)

833

834 **S6 Fig. A. Somy in bone marrow and spleen samples.** BM=Bone marrow and SP=spleen. The  
835 y-axis and x-axis represent somy and chromosome, respectively. S-values and standard  
836 deviation error bars are given in black filled circle and vertical line, respectively. The S- and  
837 standard deviation values for the bone marrow samples were based on the binned depth  
838 method. The samples were sorted in the order of higher genome coverage, the 3 categories  
839 reflect resolution of somy estimation 1) High: whose genome coverage ranging from 99.45%  
840 to 89.10%. 2) Medium: whose genome coverage ranging from 86.93% to 56.60%. 3) Low:  
841 whose genome coverage ranging from 45.80% to 9.80%. In the lower Leishmania DNA  
842 concentration samples, it is still possible to identify higher copy number in chromosome 31.  
843 S-values of chromosome 2 and 11 were higher for almost all samples but these higher values  
844 were also observed in artificial mixtures of BPK282 where chromosome 2 and 11 were  
845 definitively disomic. Close inspection of read depth did not reveal any particular evidences to  
846 support their S-values to be higher than 2. **B.** Correlation between gene depth at 303 ISC1-  
847 specific CNV genes identified in promastigote samples. Correlation was moderately high  $r^2 =$   
848 0.68,  $p$ -value =  $10^{-76}$  and slope = 0.882 indicating that SuSL-seq can be used to confirm existing  
849 group-specific CNVs. On the plot, colored dots represent counts in log10 scale and probability  
850 density distributions were given on the corresponding axes. (*S1toS8figs.pdf*)

851

852 **S7 Fig. Allele frequency for the amplicon diagnostic of ISC5 genotype estimated with NGS-**  
853 **based deep amplicon sequencing.** Blue line represents the frequency for the non-ISC5 allele,  
854 while the orange line represents the ISC5-specific allele, which contains a 2bp-insertion in the

855 AQP1 locus. Arrows indicate the two clinical samples in which a second allele was detected  
856 above the background, being statistically significant for BPK120\_ISC5\_BM. BM, Bone Marrow;  
857 SP, Spleen aspirate; MO, cultured isolate; NC, Negative Control, a cloned strain where the  
858 diagnostic ISC5-specific allele is absent; PC, Positive Control, a cloned strain characterized by  
859 the presence of the diagnostic ISC5-specific allele. (*S1toS8figs.pdf*)

860

861 **S8 Fig. Growth competition experiment.** Flasks were inoculated with individual cloned  
862 strains or mixtures of two cloned strains in the following ratios: 90/10, 50/50 and 10/90.  
863 Cultures were analyzed at the beginning of the experiment (Start), after 5, 15, 20 and 24  
864 passages (P5, P15, P20 and P24 respectively). Diagnostic PCR that allows to distinguish  
865 between the two compared strains was used to monitor the presence of each strain in  
866 culture. A selected fragment of chromatogram containing the variable nucleotide (labelled  
867 with red circle) is shown. Arrows point at the samples where the changes in dominance  
868 occurred. **A.** Competition between the BPK091, and BPK077 strains (ISC4, and ISC6,  
869 respectively). **B.** Competition between the BPK091, and BPK067 strains (ISC4, and ISC3,  
870 respectively). (*S1toS8figs.pdf*)

871

872

873 **S1 Dataset. A. Leishmania genome equivalents in samples used for NGS-based amplicon**  
874 **sequencing.** The table shows the percentage of Leishmania DNA in the sample, the total  
875 amount of DNA, the amount of *Leishmania* DNA and the corresponding *Leishmania* genome  
876 equivalents used in each reaction to amplify short DNA fragments containing the diagnostic  
877 SNPs/AQP1 insertion for specific ISC genotypes. SuSL-seq genotype denotes the genotype  
878 assessed based on the phylogenomic clustering, while amplicon-seq genotype is based on the

879 4 diagnostic SNPs described by Rai et al. (ref 10). \$, there are no ISC group-specific SNPs for  
880 ISC9 and ISC11, hence we could only report the negative results for ISC3-6 diagnostic SNPs. **B.**  
881 **Excluded regions for somy estimation.** For all chromosomes, the first 7000 bases and the last  
882 2000 bases were excluded for depth evaluation. In addition, positions (x) in the following  
883 ranges were excluded because of the depth errors associated with SureSelect enrichment and  
884 because of the known major repetitive or amplified regions (see remarks). **C. Genotyping**  
885 **using group specific SNP motifs:** The table shows the ISC group, chromosome, position,  
886 reference allele, SNP allele, SNP score based on GATK, reference base motif and SNP base  
887 motif. All the diagnostic SNPs were homozygous SNPs except those of ISC7. Here ISC7  
888 genotype was not detected: in a previous study (1), we found that genotype exclusively in  
889 India. A diagnostic SNP and reference base are located at the 12th base. **D. ISC5 AQP1**  
890 **insertion motifs:** The reference base motif and AQP1 insertion base motif, along with  
891 neighboring motives that includes 2 base insertions of any base combinations at a given  
892 position are shown. The frequency counts of these motives were given for each sample and  
893 these neighboring motives were used to estimate the error rates for detecting any two-base  
894 insertion nearby. These data indicated that the insertion detection error rates were extremely  
895 low. ISC5 strains showed higher insertion error rate but these were likely associated with base  
896 errors in the detection of the AQP1 insertion. **E. The sequence depth and coverage statistics:**  
897 The average values of median depth of 36 chromosomes, the depth standard deviation, the  
898 genome coverage of SureSelect enriched and raw samples were given for each sample. Low  
899 sequence depth samples were marked as LOWDEP, indicating that these samples were not  
900 included in the main phylogenetic tree because of their missing depth and coverage. Somy  
901 detection accuracy classification was assigned to each sample. High corresponds to 36 high  
902 genome coverage samples, Medium corresponds to 16 medium range genome coverage

903 samples and Low corresponds to 9 low genome coverage samples. NA corresponds to 2  
904 samples with almost no informative genome coverage. Further descriptions were found in  
905 the text. **F. Sympatric genotypic diversity at VDC (village development committee, the**  
906 **lowest administrative unit in Nepal) level (available on request to authors).** VDCs where 2  
907 different ISC genotypes (or more) were identified. See more details on the corresponding  
908 samples in S1 Table 1. \*, because of lower sequence quality, ISC genotype was defined by a  
909 set of diagnostic SNPs. <sup>1</sup> Patients 80, 207 and 208 belong to the same family: they presented  
910 2 different genotypes sampled at 10 months of interval. <sup>2</sup> Patients 89 and 91 belong to the  
911 same family: they presented 2 different genotypes sampled at the same time. **G. New**  
912 **insertions identified in SureSelect samples:** These indels were in non-repetitive regions and  
913 supported with depth greater than 60. They were only identified in SureSelect samples. This  
914 illustrated that previously unknown indels can be detected in SureSelect samples when there  
915 was sufficient depth. These indel calls were verified on the IGV alignment viewer to ensure  
916 the accuracy of indel alternative allele frequencies. (*S1Dataset.xlsx*)

917

918



**A**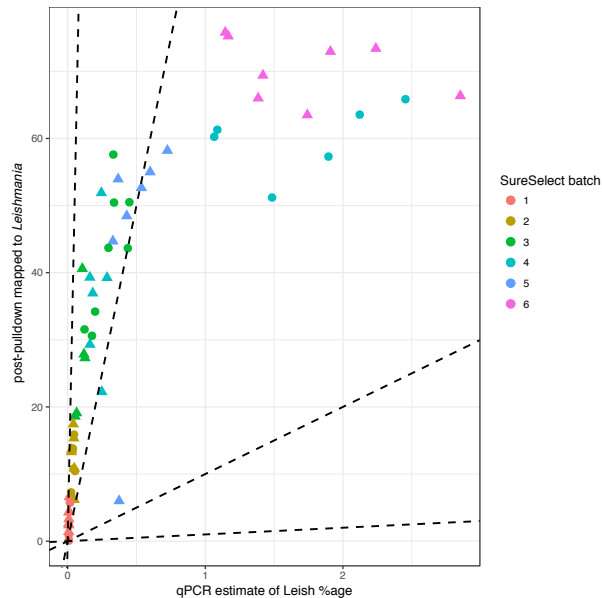**B**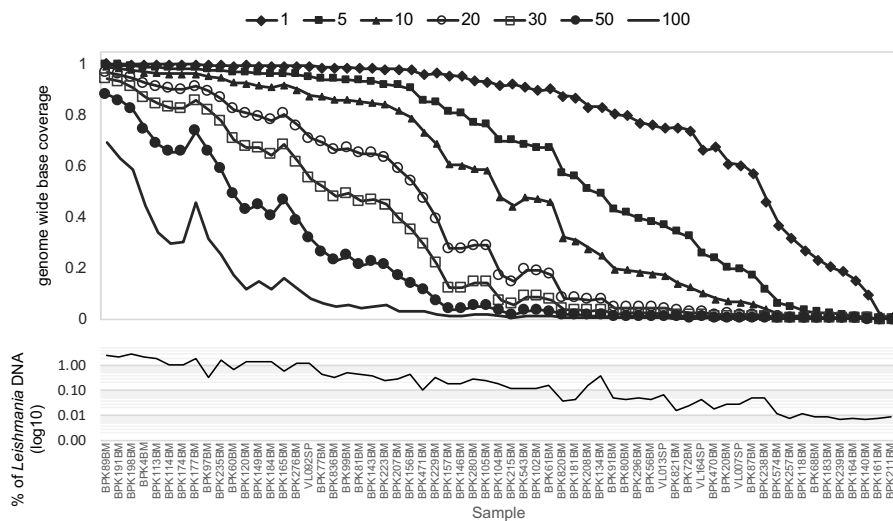

**Fig. 1. Performance of SuSL-sequencing on clinical samples.** **A.** Enrichment of *Leishmania* DNA from clinical samples by SureSelect; The y-axis shows percentage of reads mapping to the *L. donovani* reference genome following SureSelect enrichment. The x-axis is the pre-enrichment percentage of *Leishmania* DNA, estimated by either whole-genome sequencing or qPCR; dotted lines indicate no enrichment and 10-, 100- and 1000-fold enrichment. **B.** Read mapping statistics in the 63 samples after SureSelect enrichment. The upper panel shows evenness of genome coverage as the proportion of bases covered with a minimum of number of sequencing reads from 1 to 100 as indicated by the seven different lines. The lower panel shows the percentage of reads mapping to the *Leishmania* reference genome for each sample, shown on the x-axis. The x-axis is common to both panels. BM, Bone Marrow; SP, Spleen aspirate.

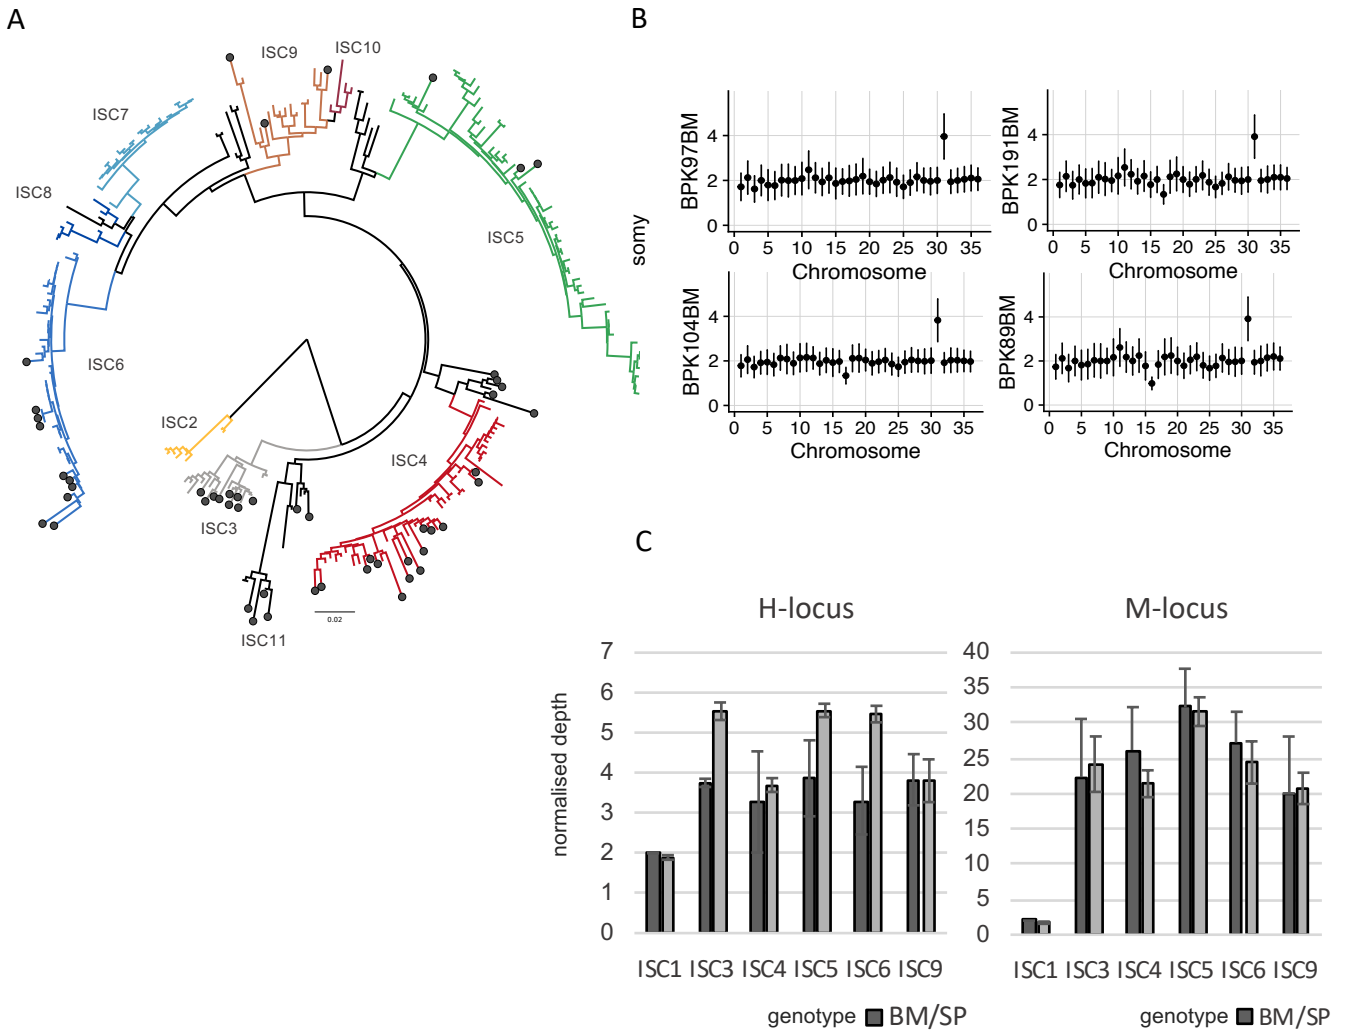

**Fig. 2. Genomic diversity among clinical samples.** **A.** SNPs. Phylogenetic tree based on SureSelect enriched clinical samples (black circle) and previously sequenced isolates (1). Diagram is a neighbor-joining phylogeny based on 197 variable sites. ISC2-ISC10 were sub-populations previously defined (1); ISC11 is a novel group that includes clinical samples and isolates previously designated as ‘ungrouped’. Full sample identifiers are shown in Fig. S5A. **B.** Karyotypes (High quality samples). Y axis shows normalized somy estimate for each chromosome (x axis). Points show central estimate and bars show one standard deviation around these estimates, calculated by the binned depth method. **C.** Local CNVs. Average copy number per cell of H- and M-loci per ISC group in SureSelect enriched clinical samples (Bone Marrow or Spleen aspirate; BM/SP) and in cultured isolates (promastigotes, Prom). Error bars show one standard deviation around the mean estimate. Only a single sample was available from bone marrow aspirates in ISC1, hence no standard deviation is shown.

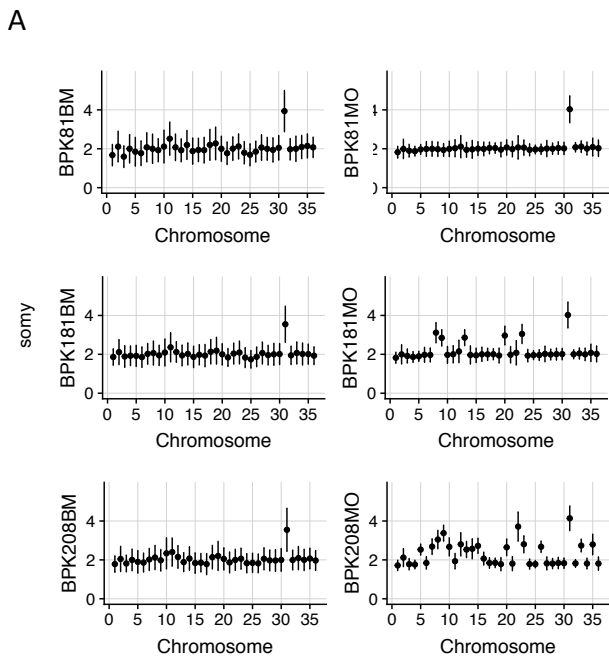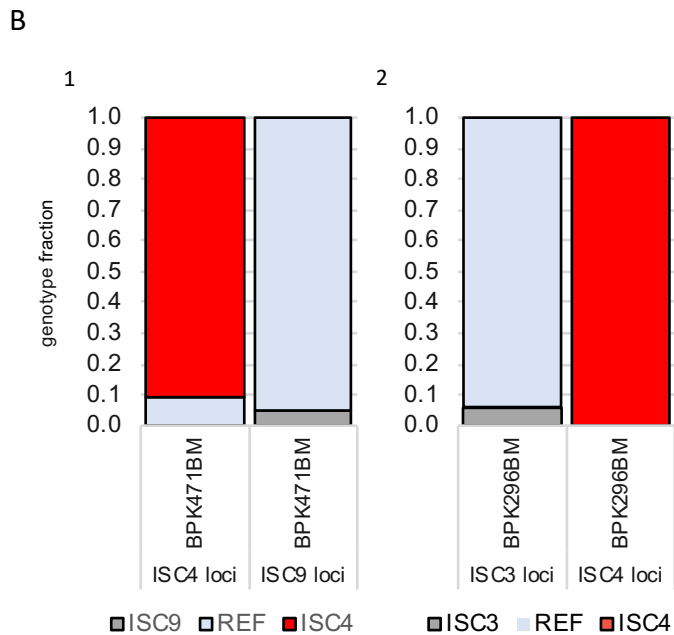

**Fig. 3. Somy comparison between matched clinical samples and culture parasites.**

**A.** Inferred somy for 3 samples for which SureSelect-enriched bone marrow (BM) samples and cultured isolates (MO) from the same patients had matching ISC genotypes. The y-axis shows normalized somy estimate for each chromosome (the x-axis). Points show central estimate and bars show one standard deviation around these estimates. Somy estimates and standard deviations for the bone marrow samples were based on the binned depth method while corresponding values for isolates were based on depth of each position. **B.** Evidence for polyclonal infections. The bars represent the proportion of sequencing reads showing the ISC-specific genotype or the reference (REF) genotype at loci with ISC-specific alleles. 1) Genotypes at ISC9 and ISC4 loci for SureSelect-enriched bone marrow sample BPK471BM. 2) Genotypes at ISC4 and ISC3 loci for SureSelect-enriched bone marrow sample BPK296BM.
